# Supplementary material
Source: PubMed Central journal article supplement (PMC9669165)
Supplement: NIHMS1841107-supplement-ExtracellularDataSets.pdf [file NIHMS1841107-supplement-ExtracellularDataSets.pdf]

Figure 2B

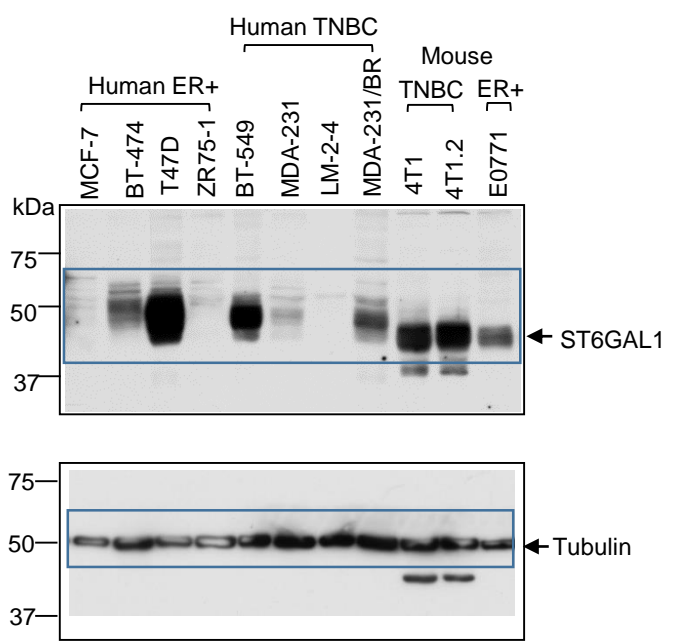

Figure 3A

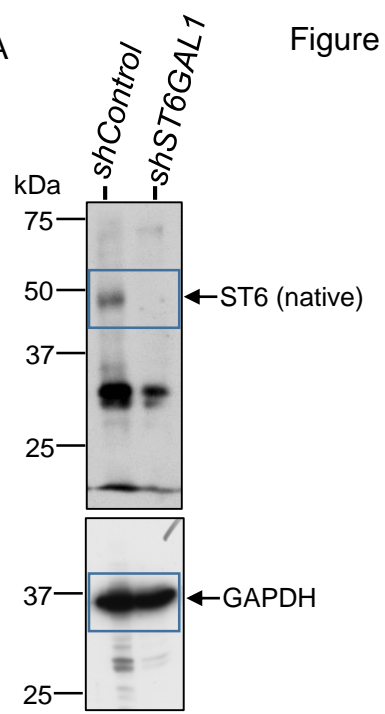

Figure 3D

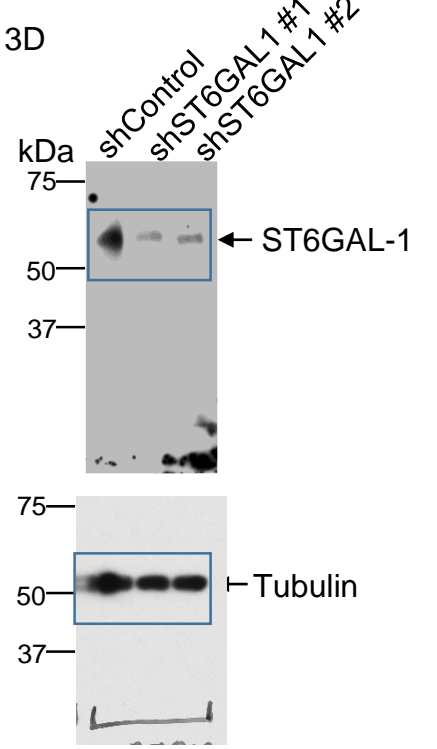

Fig 4A

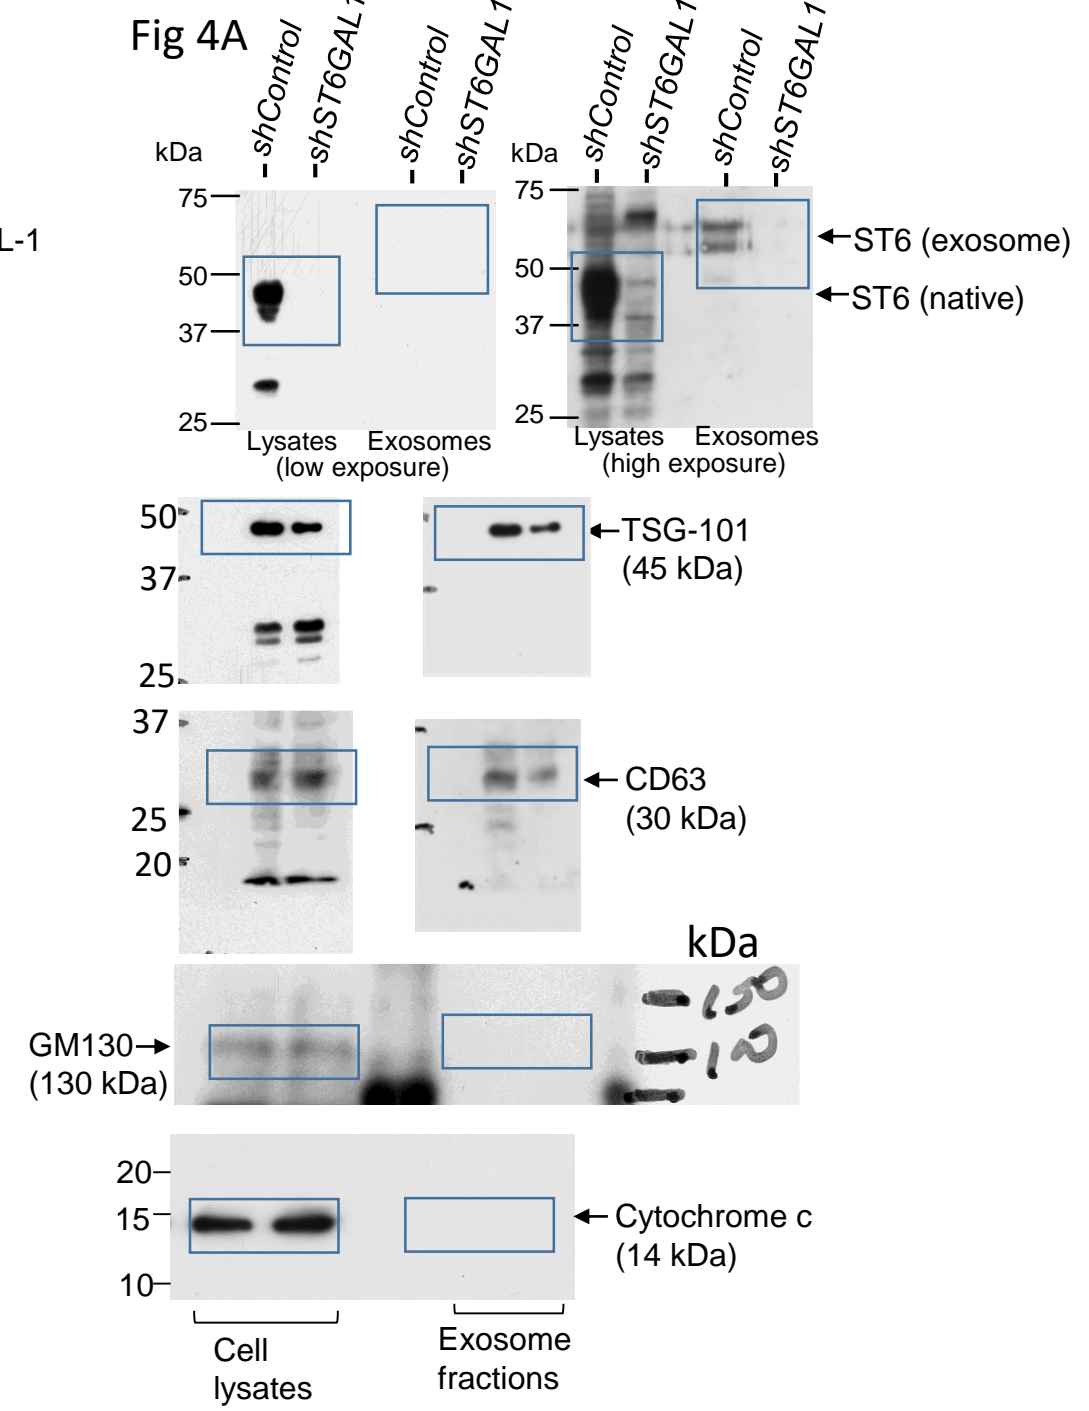

Fig. 7A

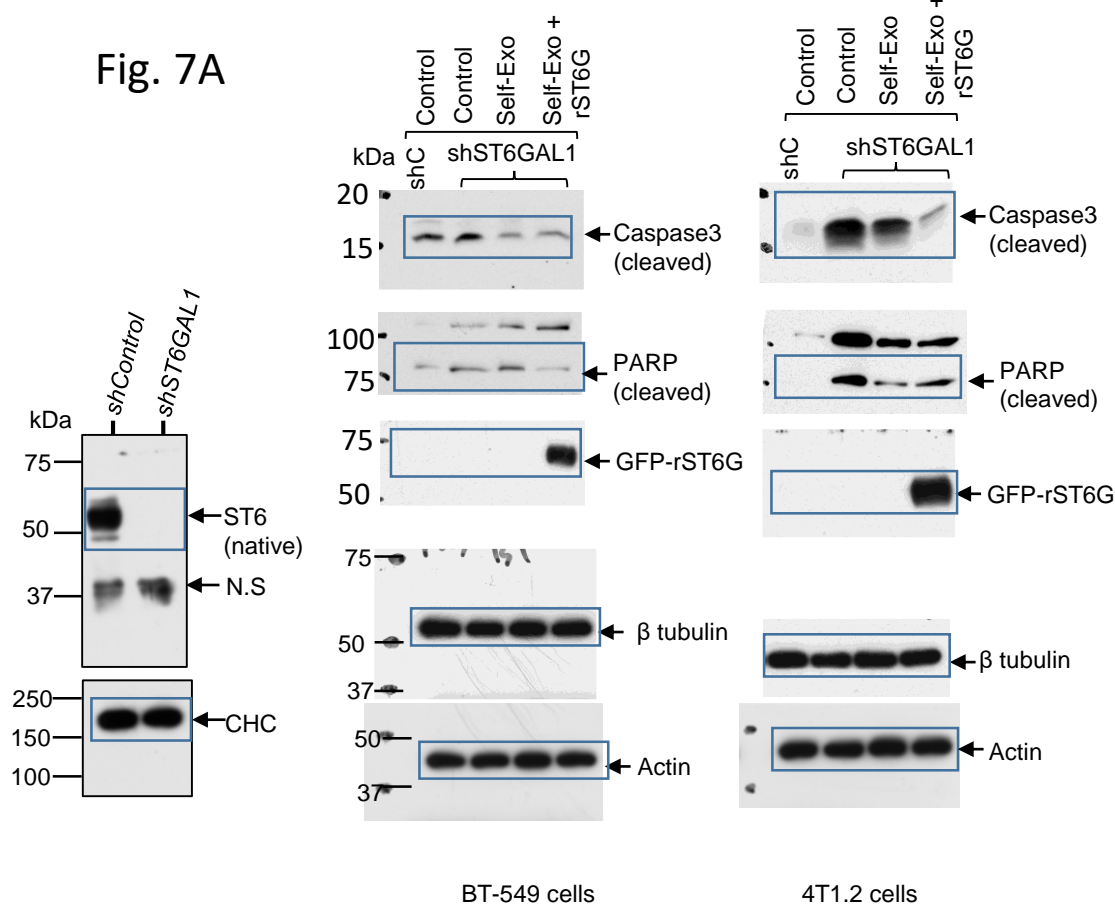

Fig. 7B

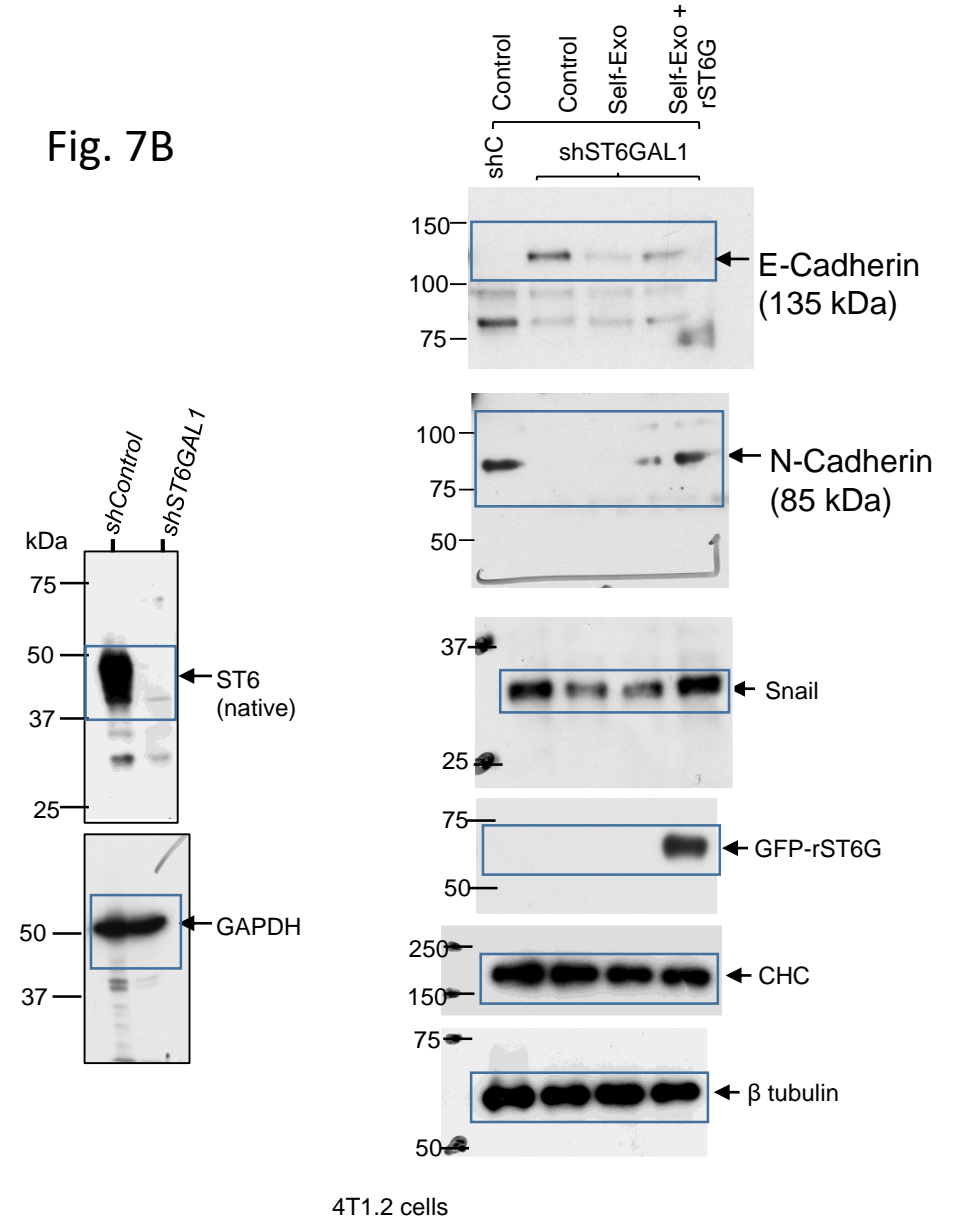

Fig. 7D

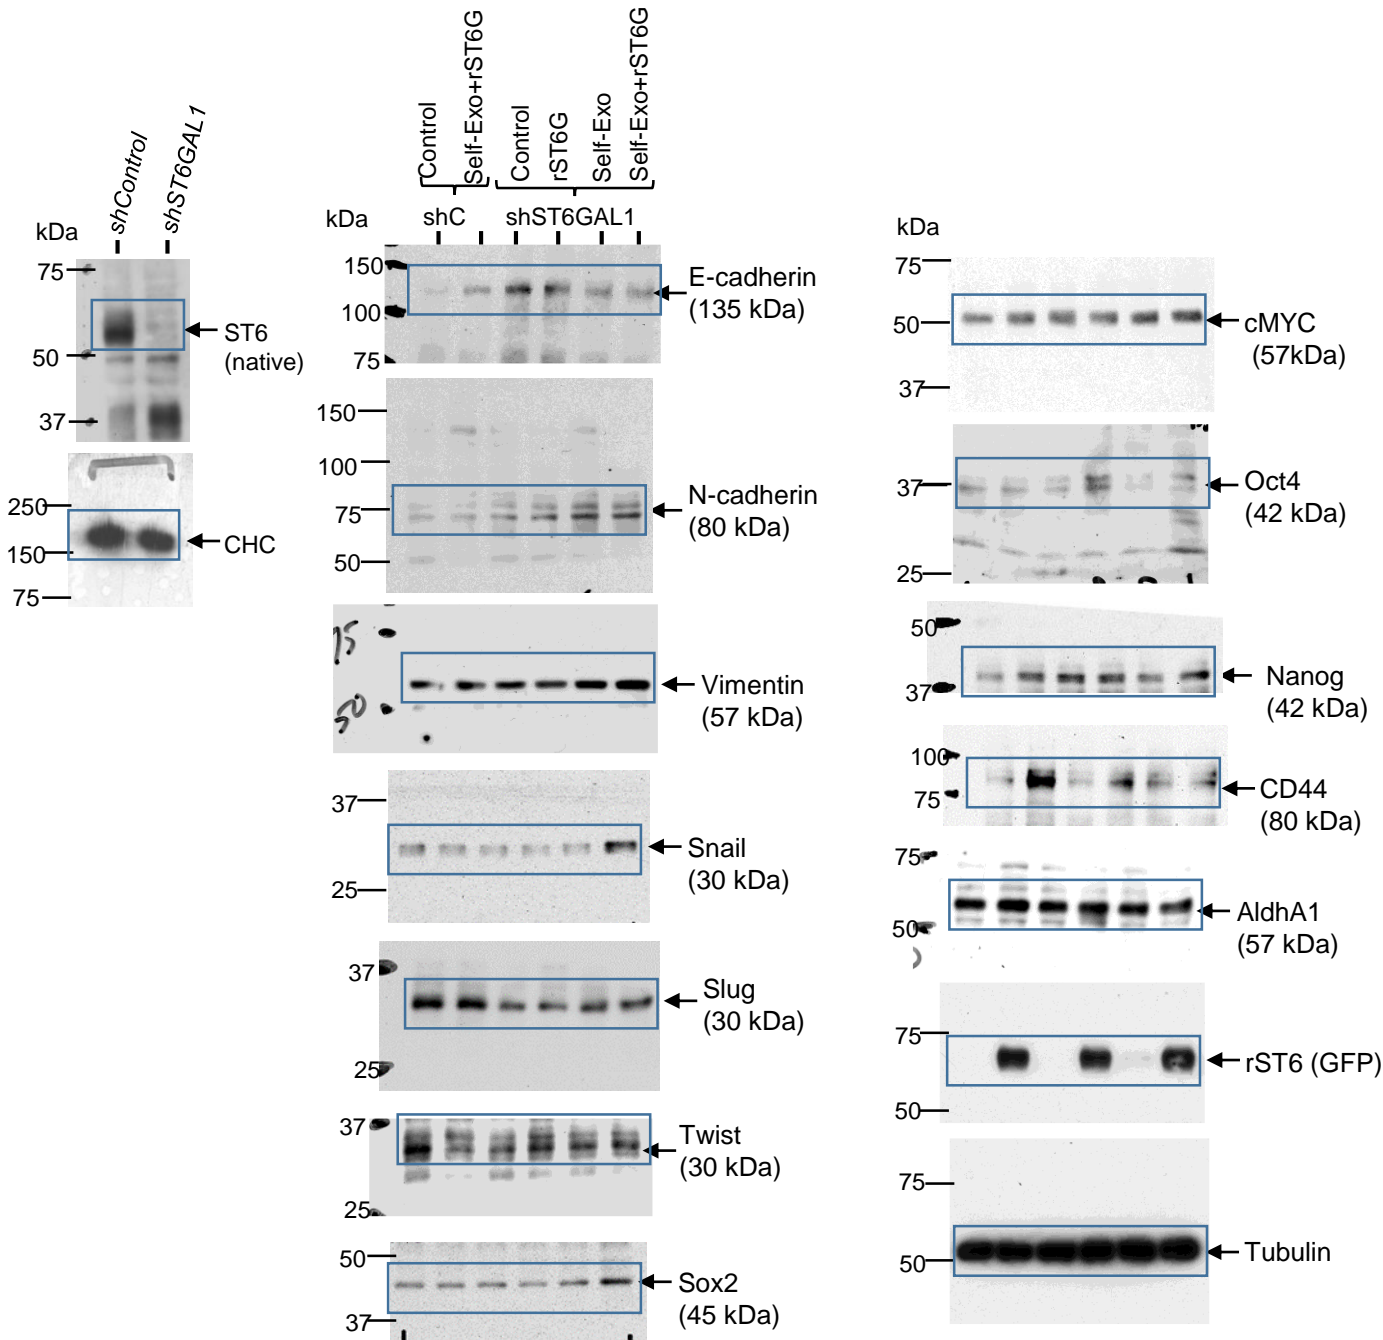

| Well                          | Fluor | Target | Target  | Sample  | Cq        | Cq        |          |                          |        |       |       |
|-------------------------------|-------|--------|---------|---------|-----------|-----------|----------|--------------------------|--------|-------|-------|
| Original qPCR File for Fig 2A |       |        |         |         | Ct values | Ct Values |          |                          |        |       | N=3   |
|                               |       |        |         | Samples | GAPDH     | ST6GAL1   | Delta Ct | 2 <sup>-(dCT)</sup> x100 | Ave.   | S.D.  | S.E.  |
| A01                           | SYBR  | GAPDH  | ST6GAL1 | MCF7    | 23.22     | 33.05     | 9.83     | 0.110                    | 0.09   | 0.03  | 0.01  |
| A02                           | SYBR  | GAPDH  | ST6GAL1 | MCF7    | 23.32     | 33.93     | 10.61    | 0.064                    |        |       |       |
| A03                           | SYBR  | GAPDH  | ST6GAL1 | MCF7    | 23.57     | 33.44     | 9.87     | 0.107                    |        |       |       |
| A04                           | SYBR  | GAPDH  | ST6GAL1 | BT474   | 16.25     | 26.40     | 10.15    | 0.088                    | 0.09   | 0.02  | 0.01  |
| A05                           | SYBR  | GAPDH  | ST6GAL1 | BT474   | 16.40     | 26.96     | 10.56    | 0.066                    |        |       |       |
| A06                           | SYBR  | GAPDH  | ST6GAL1 | BT474   | 16.30     | 26.17     | 9.87     | 0.107                    |        |       |       |
| A07                           | SYBR  | GAPDH  | ST6GAL1 | T47D    | 22.31     | 30.41     | 8.11     | 0.363                    | 0.39   | 0.04  | 0.02  |
| A08                           | SYBR  | GAPDH  | ST6GAL1 | T47D    | 22.22     | 30.07     | 7.85     | 0.432                    |        |       |       |
| A09                           | SYBR  | GAPDH  | ST6GAL1 | T47D    | 22.10     | 30.19     | 8.09     | 0.366                    |        |       |       |
| A10                           | SYBR  | GAPDH  | ST6GAL1 | ZR75-1  | 22.10     | 31.39     | 9.29     | 0.160                    | 0.17   | 0.01  | 0.01  |
| A11                           | SYBR  | GAPDH  | ST6GAL1 | ZR75-1  | 22.10     | 31.25     | 9.15     | 0.176                    |        |       |       |
| A12                           | SYBR  | GAPDH  | ST6GAL1 | ZR75-1  | 22.10     | 31.23     | 9.14     | 0.178                    |        |       |       |
| B01                           | SYBR  | GAPDH  | ST6GAL1 | BT549   | 21.54     | 30.09     | 8.55     | 0.266                    | 0.31   | 0.07  | 0.04  |
| B02                           | SYBR  | GAPDH  | ST6GAL1 | BT549   | 21.54     | 30.02     | 8.48     | 0.280                    |        |       |       |
| B03                           | SYBR  | GAPDH  | ST6GAL1 | BT549   | 21.54     | 29.55     | 8.01     | 0.388                    |        |       |       |
| B04                           | SYBR  | GAPDH  | ST6GAL1 | MDA231  | 17.58     | 26.29     | 8.71     | 0.239                    | 0.21   | 0.04  | 0.02  |
| B05                           | SYBR  | GAPDH  | ST6GAL1 | MDA231  | 17.58     | 26.82     | 9.24     | 0.165                    |        |       |       |
| B06                           | SYBR  | GAPDH  | ST6GAL1 | MDA231  | 17.58     | 26.28     | 8.70     | 0.240                    |        |       |       |
| B07                           | SYBR  | GAPDH  | ST6GAL1 | LM-2-4  | 19.44     | 29.01     | 9.57     | 0.132                    | 0.12   | 0.01  | 0.01  |
| B08                           | SYBR  | GAPDH  | ST6GAL1 | LM-2-4  | 19.28     | 29.00     | 9.73     | 0.118                    |        |       |       |
| B09                           | SYBR  | GAPDH  | ST6GAL1 | LM-2-4  | 19.36     | 29.14     | 9.77     | 0.114                    |        |       |       |
| B10                           | SYBR  | GAPDH  | ST6GAL1 | 231BR   | 18.18     | 27.13     | 8.95     | 0.202                    | 0.27   | 0.07  | 0.04  |
| B11                           | SYBR  | GAPDH  | ST6GAL1 | 231BR   | 18.85     | 27.03     | 8.18     | 0.345                    |        |       |       |
| B12                           | SYBR  | GAPDH  | ST6GAL1 | 231BR   | 18.05     | 26.68     | 8.63     | 0.253                    |        |       |       |
| C01                           | SYBR  | GAPDH  | ST6GAL1 | 4T1.    | 27.28     | 26.20     | -1.08    | 210.865                  | 238.09 | 48.65 | 28.09 |
| C02                           | SYBR  | GAPDH  | ST6GAL1 | 4T1.    | 27.88     | 26.82     | -1.06    | 209.140                  |        |       |       |
| C03                           | SYBR  | GAPDH  | ST6GAL1 | 4T1.    | 27.64     | 26.09     | -1.56    | 294.256                  |        |       |       |
| C04                           | SYBR  | GAPDH  | ST6GAL1 | 4T1.2   | 28.44     | 29.47     | 1.03     | 48.846                   | 40.97  | 7.40  | 4.27  |
| C05                           | SYBR  | GAPDH  | ST6GAL1 | 4T1.2   | 27.75     | 29.30     | 1.55     | 34.159                   |        |       |       |
| C06                           | SYBR  | GAPDH  | ST6GAL1 | 4T1.2   | 28.00     | 29.33     | 1.33     | 39.909                   |        |       |       |
| C07                           | SYBR  | GAPDH  | ST6GAL1 | E0771   | 26.49     | 31.05     | 4.55     | 4.260                    | 3.76   | 0.66  | 0.38  |
| C08                           | SYBR  | GAPDH  | ST6GAL1 | E0771   | 26.80     | 31.44     | 4.64     | 4.003                    |        |       |       |
| C09                           | SYBR  | GAPDH  | ST6GAL1 | E0771   | 26.79     | 31.84     | 5.05     | 3.011                    |        |       |       |

| Well                                 | Fluor | Target | Target  | Sample        | Cq        | Cq        |       |       |                      |      |      |     | Ave  |
|--------------------------------------|-------|--------|---------|---------------|-----------|-----------|-------|-------|----------------------|------|------|-----|------|
| <b>Original qPCR File for Fig 3A</b> |       |        |         |               | Ct values | Ct Values |       |       |                      |      |      | N=3 | dCt  |
|                                      |       |        |         | Samples       | GAPDH     | ST6GAL1   | dCT   | ddCT  | 2 <sup>-(ddCT)</sup> | Ave. | S.D. |     |      |
| A01                                  | SYBR  | GAPDH  | ST6GAL1 | 4T1.2 sh Cont | 22.43     | 19.67     | 2.76  | 0.16  | 0.89                 | 1.00 | 0.09 |     | 2.60 |
| A02                                  | SYBR  | GAPDH  | ST6GAL1 | 4T1.2 sh Cont | 22.32     | 19.79     | 2.52  | -0.08 | 1.05                 |      |      |     |      |
| A03                                  | SYBR  | GAPDH  | ST6GAL1 | 4T1.2 sh Cont | 22.36     | 19.84     | 2.52  | -0.08 | 1.05                 |      |      |     |      |
| A04                                  | SYBR  | GAPDH  | ST6GAL1 | 4T1.2 shST6   | 40.00     | 28.85     | 11.15 | 8.55  | 0.00                 | 0.01 | 0.01 |     |      |
| A05                                  | SYBR  | GAPDH  | ST6GAL1 | 4T1.2 shST6   | 40.00     | 28.69     | 11.31 | 8.71  | 0.00                 |      |      |     |      |
| A06                                  | SYBR  | GAPDH  | ST6GAL1 | 4T1.2 shST6   | 38.00     | 29.26     | 8.74  | 6.14  | 0.01                 |      |      |     |      |

| <b>Original qPCR File for Fig 3D</b> |       |               |              |            |       |      |                      |        |        |      |  | N=3 | Ave. |
|--------------------------------------|-------|---------------|--------------|------------|-------|------|----------------------|--------|--------|------|--|-----|------|
| BT-549 cells                         | Fluor | Samples       | CT (ST6GAL1) | CT (GAPDH) | dCT   | ddCT | 2 <sup>-(ddCT)</sup> | Ave.   | S.D.   | dCT  |  |     |      |
| shControl                            | SYBR  | BT549-sh Cont | 22.43        | 20.67      | 1.76  | 0.2  | 0.89                 | 1.0011 | 0.0921 | 1.60 |  |     |      |
|                                      | SYBR  | BT549-sh Cont | 22.32        | 20.79      | 1.52  | -0.1 | 1.05                 |        |        |      |  |     |      |
|                                      | SYBR  | BT549-sh Cont | 22.36        | 20.84      | 1.52  | -0.1 | 1.05                 |        |        |      |  |     |      |
| shST6GAL-1 #1                        | SYBR  | BT549-shST6-1 | 28.00        | 20.85      | 7.15  | 5.5  | 0.02                 | 0.0626 | 0.0778 |      |  |     |      |
|                                      | SYBR  | BT549-shST6-1 | 27.00        | 22.69      | 4.31  | 2.7  | 0.15                 |        |        |      |  |     |      |
|                                      | SYBR  | BT549-shST6-1 | 31.00        | 23.26      | 7.74  | 6.1  | 0.01                 |        |        |      |  |     |      |
| shST6GAL-1 #2                        | SYBR  | BT549-shST6-2 | 29.00        | 20.69      | 8.31  | 6.7  | 0.01                 | 0.0545 | 0.0848 |      |  |     |      |
|                                      | SYBR  | BT549-shST6-2 | 32.00        | 21.26      | 10.74 | 9.1  | 0.00                 |        |        |      |  |     |      |
|                                      | SYBR  | BT549-shST6-2 | 26.00        | 21.69      | 4.31  | 2.7  | 0.15                 |        |        |      |  |     |      |

| <b>Original qPCR File for Fig 7C</b> |       |         |                 |         |       |       |          |                      |      |      |      | N=3  | Delta Ct |
|--------------------------------------|-------|---------|-----------------|---------|-------|-------|----------|----------------------|------|------|------|------|----------|
| Well                                 | Fluor | Target  | Samples         | ST6GAL1 | GPDH  | Ct    | Delta-Ct | 2 <sup>-(ddct)</sup> | AVE. | S.D. | S.E. | AVE. |          |
| A01                                  | SYBR  | ST6GAL1 | T47D_1_cnt      | 24.64   | 14.69 | 9.95  | (0.04)   | 1.03                 | 1.00 | 0.05 | 0.03 | 9.99 |          |
| A02                                  | SYBR  | ST6GAL1 | T47D_1_cnt      | 24.57   | 14.62 | 9.94  | (0.05)   | 1.03                 |      |      |      |      |          |
| A03                                  | SYBR  | ST6GAL1 | T47D_1_cnt      | 24.66   | 14.59 | 10.07 | 0.08     | 0.95                 |      |      |      |      |          |
| A04                                  | SYBR  | ST6GAL1 | T47D_2_cnt+     | 24.70   | 14.42 | 10.28 | 0.29     | 0.82                 | 0.89 | 0.09 | 0.05 |      |          |
| A05                                  | SYBR  | ST6GAL1 | T47D_2_cnt+     | 24.48   | 14.49 | 9.99  | 0.00     | 1.00                 |      |      |      |      |          |
| A06                                  | SYBR  | ST6GAL1 | T47D_2_cnt+     | 24.55   | 14.33 | 10.21 | 0.22     | 0.86                 |      |      |      |      |          |
| A07                                  | SYBR  | ST6GAL1 | T47D_3_Sh#1     | 26.25   | 14.45 | 11.80 | 1.81     | 0.29                 | 0.24 | 0.10 | 0.06 |      |          |
| A08                                  | SYBR  | ST6GAL1 | T47D_3_Sh#1     | 26.25   | 14.59 | 11.65 | 1.66     | 0.32                 |      |      |      |      |          |
| A09                                  | SYBR  | ST6GAL1 | T47D_3_Sh#1     | 26.11   | 13.16 | 12.95 | 2.96     | 0.13                 |      |      |      |      |          |
| A10                                  | SYBR  | ST6GAL1 | T47D_4+ rST6    | 26.13   | 14.30 | 11.83 | 1.84     | 0.28                 | 0.27 | 0.02 | 0.01 |      |          |
| A11                                  | SYBR  | ST6GAL1 | T47D_4+ rST6    | 26.17   | 14.34 | 11.83 | 1.84     | 0.28                 |      |      |      |      |          |
| A12                                  | SYBR  | ST6GAL1 | T47D_4+ rST6    | 26.31   | 14.27 | 12.04 | 2.05     | 0.24                 |      |      |      |      |          |
| B01                                  | SYBR  | ST6GAL1 | T47D_5+EXO      | 26.77   | 15.17 | 11.61 | 1.62     | 0.33                 | 0.32 | 0.00 | 0.00 |      |          |
| B02                                  | SYBR  | ST6GAL1 | T47D_5+EXO      | 26.70   | 15.10 | 11.60 | 1.61     | 0.33                 |      |      |      |      |          |
| B03                                  | SYBR  | ST6GAL1 | T47D_5+EXO      | 26.67   | 15.04 | 11.63 | 1.64     | 0.32                 |      |      |      |      |          |
| B04                                  | SYBR  | ST6GAL1 | T47D_6+EXO/rST6 | 27.16   | 15.69 | 11.48 | 1.49     | 0.36                 | 0.31 | 0.04 | 0.02 |      |          |
| B05                                  | SYBR  | ST6GAL1 | T47D_6+EXO/rST6 | 27.12   | 15.45 | 11.67 | 1.68     | 0.31                 |      |      |      |      |          |
| B06                                  | SYBR  | ST6GAL1 | T47D_6+EXO/rST6 | 27.23   | 15.37 | 11.86 | 1.87     | 0.27                 |      |      |      |      |          |

|  |  |  |  | Ct | Ct | Delta | Delta-Delta |  |  |  |  |  | Delta Ct |
|--|--|--|--|----|----|-------|-------------|--|--|--|--|--|----------|
|--|--|--|--|----|----|-------|-------------|--|--|--|--|--|----------|

| E-Cadherin gene |      |            |                 | E-Cadherin | GPDH  | Ct    | Ct     | 2 <sup>Δ(-ddct)</sup> | AVE. | S.D. | S.E. | AVE.   |
|-----------------|------|------------|-----------------|------------|-------|-------|--------|-----------------------|------|------|------|--------|
| A01             | SYBR | E-Cadherin | T47D_1_cnt      | 34.75      | 14.69 | 20.06 | 0.12   | 0.92                  | 1.02 | 0.25 | 0.14 | 19.939 |
| A02             | SYBR | E-Cadherin | T47D_1_cnt      | 34.82      | 14.62 | 20.20 | 0.26   | 0.83                  |      |      |      |        |
| A03             | SYBR | E-Cadherin | T47D_1_cnt      | 34.15      | 14.59 | 19.56 | (0.38) | 1.30                  |      |      |      |        |
| A04             | SYBR | E-Cadherin | T47D_2_cnt+     | 35.81      | 14.42 | 21.39 | 1.45   | 0.37                  | 0.43 | 0.06 | 0.03 |        |
| A05             | SYBR | E-Cadherin | T47D_2_cnt+     | 35.56      | 14.49 | 21.07 | 1.14   | 0.46                  |      |      |      |        |
| A06             | SYBR | E-Cadherin | T47D_2_cnt+     | 35.34      | 14.33 | 21.01 | 1.07   | 0.48                  |      |      |      |        |
| A07             | SYBR | E-Cadherin | T47D_3_Sh#1     | 33.01      | 14.45 | 18.56 | (1.37) | 2.59                  | 2.54 | 0.38 | 0.22 |        |
| A08             | SYBR | E-Cadherin | T47D_3_Sh#1     | 33.00      | 14.59 | 18.41 | (1.53) | 2.89                  |      |      |      |        |
| A09             | SYBR | E-Cadherin | T47D_3_Sh#1     | 32.00      | 13.16 | 18.84 | (1.09) | 2.14                  |      |      |      |        |
| A10             | SYBR | E-Cadherin | T47D_4+ rST6    | 33.98      | 14.30 | 19.67 | (0.27) | 1.20                  | 1.24 | 0.31 | 0.18 |        |
| A11             | SYBR | E-Cadherin | T47D_4+ rST6    | 33.63      | 14.34 | 19.29 | (0.65) | 1.57                  |      |      |      |        |
| A12             | SYBR | E-Cadherin | T47D_4+ rST6    | 34.26      | 14.27 | 20.00 | 0.06   | 0.96                  |      |      |      |        |
| B01             | SYBR | E-Cadherin | T47D_5+EXO      | 35.09      | 15.17 | 19.92 | (0.02) | 1.01                  | 1.24 | 0.21 | 0.12 |        |
| B02             | SYBR | E-Cadherin | T47D_5+EXO      | 34.54      | 15.10 | 19.44 | (0.49) | 1.41                  |      |      |      |        |
| B03             | SYBR | E-Cadherin | T47D_5+EXO      | 34.59      | 15.04 | 19.55 | (0.39) | 1.31                  |      |      |      |        |
| B04             | SYBR | E-Cadherin | T47D_6+EXO/rST6 | 35.62      | 15.69 | 19.93 | (0.00) | 1.00                  | 0.91 | 0.09 | 0.05 |        |
| B05             | SYBR | E-Cadherin | T47D_6+EXO/rST6 | 35.67      | 15.45 | 20.22 | 0.28   | 0.82                  |      |      |      |        |
| B06             | SYBR | E-Cadherin | T47D_6+EXO/rST6 | 35.46      | 15.37 | 20.09 | 0.15   | 0.90                  |      |      |      |        |

| N-Cadherin gene |      |            |                 | Ct         | Ct    | Delta | Delta-Delta | 2 <sup>Δ(-ddct)</sup> | AVE.   | S.D. | S.E. | Delta Ct |
|-----------------|------|------------|-----------------|------------|-------|-------|-------------|-----------------------|--------|------|------|----------|
|                 |      |            |                 | N-Cadherin | GPDH  | Ct    | Ct          |                       |        |      |      |          |
| E01             | SYBR | N-Cadherin | T47D_1_cnt      | 34.07      | 14.69 | 19.37 | 0.065       | 0.956                 | 1.059  | 0.45 | 0.26 | 19.31    |
| E02             | SYBR | N-Cadherin | T47D_1_cnt      | 34.51      | 14.62 | 19.88 | 0.573       | 0.672                 |        |      |      |          |
| E03             | SYBR | N-Cadherin | T47D_1_cnt      | 33.27      | 14.59 | 18.68 | (0.630)     | 1.548                 |        |      |      |          |
| E04             | SYBR | N-Cadherin | T47D_2_cnt+     | 35.06      | 14.42 | 20.64 | 1.333       | 0.397                 | 0.587  | 0.40 | 0.23 |          |
| E05             | SYBR | N-Cadherin | T47D_2_cnt+     | 33.73      | 14.49 | 19.24 | (0.066)     | 1.047                 |        |      |      |          |
| E06             | SYBR | N-Cadherin | T47D_2_cnt+     | 35.30      | 14.33 | 20.96 | 1.652       | 0.318                 |        |      |      |          |
| E07             | SYBR | N-Cadherin | T47D_3_Sh#1     | 34.00      | 14.45 | 19.56 | 0.249       | 0.841                 | 0.793  | 0.32 | 0.18 |          |
| E08             | SYBR | N-Cadherin | T47D_3_Sh#1     | 33.79      | 14.59 | 19.19 | (0.116)     | 1.084                 |        |      |      |          |
| E09             | SYBR | N-Cadherin | T47D_3_Sh#1     | 33.60      | 13.16 | 20.45 | 1.136       | 0.455                 |        |      |      |          |
| E10             | SYBR | N-Cadherin | T47D_4+ rST6    | 30.21      | 14.30 | 15.90 | (3.406)     | 10.598                | 12.932 | 4.49 | 2.59 |          |
| E11             | SYBR | N-Cadherin | T47D_4+ rST6    | 29.47      | 14.34 | 15.13 | (4.179)     | 18.111                |        |      |      |          |
| E12             | SYBR | N-Cadherin | T47D_4+ rST6    | 30.25      | 14.27 | 15.98 | (3.334)     | 10.086                |        |      |      |          |
| F01             | SYBR | N-Cadherin | T47D_5+EXO      | 31.43      | 15.17 | 16.27 | (3.042)     | 8.237                 | 12.331 | 3.60 | 2.08 |          |
| F02             | SYBR | N-Cadherin | T47D_5+EXO      | 30.62      | 15.10 | 15.52 | (3.785)     | 13.785                |        |      |      |          |
| F03             | SYBR | N-Cadherin | T47D_5+EXO      | 30.45      | 15.04 | 15.41 | (3.904)     | 14.972                |        |      |      |          |
| F04             | SYBR | N-Cadherin | T47D_6+EXO/rST6 | 30.02      | 15.69 | 14.34 | (4.974)     | 31.439                | 27.267 | 5.82 | 3.36 |          |
| F05             | SYBR | N-Cadherin | T47D_6+EXO/rST6 | 29.86      | 15.45 | 14.42 | (4.894)     | 29.740                |        |      |      |          |
| F06             | SYBR | N-Cadherin | T47D_6+EXO/rST6 | 30.32      | 15.37 | 14.94 | (4.366)     | 20.622                |        |      |      |          |

| Vimentin gene |      |          |             | Ct       | Ct    | Delta  | Delta-Delta | 2 <sup>Δ(-ddct)</sup> | AVE.  | S.D. | S.E. | Delta Ct |
|---------------|------|----------|-------------|----------|-------|--------|-------------|-----------------------|-------|------|------|----------|
|               |      |          |             | Vimentin | GPDH  | Ct     | Ct          |                       |       |      |      |          |
| E01           | SYBR | Vimentin | T47D_1_cnt  | 14.25    | 14.69 | (0.44) | (0.809)     | 1.752                 | 1.671 | 0.07 | 0.04 | (0.37)   |
| E02           | SYBR | Vimentin | T47D_1_cnt  | 14.27    | 14.62 | (0.35) | (0.721)     | 1.648                 |       |      |      |          |
| E03           | SYBR | Vimentin | T47D_1_cnt  | 14.27    | 14.59 | (0.32) | (0.690)     | 1.614                 |       |      |      |          |
| E04           | SYBR | Vimentin | T47D_2_cnt+ | 14.03    | 14.42 | (0.40) | (0.765)     | 1.700                 | 2.313 | 0.86 | 0.50 |          |

|     |      |          |                 |       |       |        |         |       |       |      |      |  |
|-----|------|----------|-----------------|-------|-------|--------|---------|-------|-------|------|------|--|
| E05 | SYBR | Vimentin | T47D_2_cnt+     | 13.90 | 14.49 | (0.59) | (0.955) | 1.939 |       |      |      |  |
| E06 | SYBR | Vimentin | T47D_2_cnt+     | 12.98 | 14.33 | (1.35) | (1.723) | 3.300 |       |      |      |  |
| E07 | SYBR | Vimentin | T47D_3_Sh#1     | 14.25 | 14.45 | (0.20) | (0.566) | 1.480 | 1.066 | 0.43 | 0.25 |  |
| E08 | SYBR | Vimentin | T47D_3_Sh#1     | 14.84 | 14.59 | 0.24   | (0.129) | 1.093 |       |      |      |  |
| E09 | SYBR | Vimentin | T47D_3_Sh#1     | 14.21 | 13.16 | 1.05   | 0.680   | 0.624 |       |      |      |  |
| E10 | SYBR | Vimentin | T47D_4+ rST6    | 14.27 | 14.30 | (0.03) | (0.400) | 1.319 | 1.166 | 0.14 | 0.08 |  |
| E11 | SYBR | Vimentin | T47D_4+ rST6    | 14.65 | 14.34 | 0.31   | (0.055) | 1.039 |       |      |      |  |
| E12 | SYBR | Vimentin | T47D_4+ rST6    | 14.45 | 14.27 | 0.18   | (0.187) | 1.139 |       |      |      |  |
| F01 | SYBR | Vimentin | T47D_5+EXO      | 14.92 | 15.17 | (0.24) | (0.612) | 1.529 | 1.401 | 0.12 | 0.07 |  |
| F02 | SYBR | Vimentin | T47D_5+EXO      | 15.01 | 15.10 | (0.09) | (0.455) | 1.371 |       |      |      |  |
| F03 | SYBR | Vimentin | T47D_5+EXO      | 15.03 | 15.04 | (0.01) | (0.381) | 1.302 |       |      |      |  |
| F04 | SYBR | Vimentin | T47D_6+EXO/rST6 | 14.58 | 15.69 | (1.11) | (1.481) | 2.791 | 2.929 | 0.27 | 0.16 |  |
| F05 | SYBR | Vimentin | T47D_6+EXO/rST6 | 14.12 | 15.45 | (1.33) | (1.696) | 3.240 |       |      |      |  |
| F06 | SYBR | Vimentin | T47D_6+EXO/rST6 | 14.28 | 15.37 | (1.09) | (1.462) | 2.755 |       |      |      |  |

| Snail gene |      |       |                 | Ct    | Ct    | Delta | Delta-Delta | 2 <sup>-(ddct)</sup> | AVE.  | S.D. | S.E. | Delta Ct |
|------------|------|-------|-----------------|-------|-------|-------|-------------|----------------------|-------|------|------|----------|
|            |      |       |                 | Snail | GPDH  | Ct    | Ct          |                      |       |      |      | AVE.     |
| E01        | SYBR | Snail | T47D_1_cnt      | 25.11 | 14.69 | 10.42 | (0.114)     | 1.082                | 1.002 | 0.07 | 0.04 | 10.53    |
| E02        | SYBR | Snail | T47D_1_cnt      | 25.20 | 14.62 | 10.57 | 0.043       | 0.971                |       |      |      |          |
| E03        | SYBR | Snail | T47D_1_cnt      | 25.19 | 14.59 | 10.60 | 0.069       | 0.953                |       |      |      |          |
| E04        | SYBR | Snail | T47D_2_cnt+     | 24.97 | 14.42 | 10.55 | 0.025       | 0.983                | 1.065 | 0.13 | 0.07 |          |
| E05        | SYBR | Snail | T47D_2_cnt+     | 24.74 | 14.49 | 10.26 | (0.274)     | 1.209                |       |      |      |          |
| E06        | SYBR | Snail | T47D_2_cnt+     | 24.86 | 14.33 | 10.52 | (0.005)     | 1.004                |       |      |      |          |
| E07        | SYBR | Snail | T47D_3_Sh#1     | 24.92 | 14.45 | 10.47 | (0.059)     | 1.042                | 0.878 | 0.38 | 0.22 |          |
| E08        | SYBR | Snail | T47D_3_Sh#1     | 24.92 | 14.59 | 10.33 | (0.203)     | 1.151                |       |      |      |          |
| E09        | SYBR | Snail | T47D_3_Sh#1     | 24.87 | 13.16 | 11.71 | 1.185       | 0.440                |       |      |      |          |
| E10        | SYBR | Snail | T47D_4+ rST6    | 24.36 | 14.30 | 10.05 | (0.476)     | 1.391                | 1.239 | 0.13 | 0.08 |          |
| E11        | SYBR | Snail | T47D_4+ rST6    | 24.66 | 14.34 | 10.32 | (0.211)     | 1.158                |       |      |      |          |
| E12        | SYBR | Snail | T47D_4+ rST6    | 24.58 | 14.27 | 10.31 | (0.223)     | 1.167                |       |      |      |          |
| F01        | SYBR | Snail | T47D_5+EXO      | 25.38 | 15.17 | 10.21 | (0.318)     | 1.247                | 1.568 | 0.32 | 0.19 |          |
| F02        | SYBR | Snail | T47D_5+EXO      | 24.71 | 15.10 | 9.61  | (0.919)     | 1.891                |       |      |      |          |
| F03        | SYBR | Snail | T47D_5+EXO      | 24.92 | 15.04 | 9.88  | (0.649)     | 1.568                |       |      |      |          |
| F04        | SYBR | Snail | T47D_6+EXO/rST6 | 24.04 | 15.69 | 8.36  | (2.174)     | 4.513                | 3.958 | 0.48 | 0.28 |          |
| F05        | SYBR | Snail | T47D_6+EXO/rST6 | 24.09 | 15.45 | 8.64  | (1.889)     | 3.705                |       |      |      |          |
| F06        | SYBR | Snail | T47D_6+EXO/rST6 | 24.03 | 15.37 | 8.66  | (1.870)     | 3.656                |       |      |      |          |

| SLUG gene |      |      |             | Ct    | Ct    | Delta | Delta-Delta | 2 <sup>-(ddct)</sup> | AVE.  | S.D. | S.E. | Delta Ct |
|-----------|------|------|-------------|-------|-------|-------|-------------|----------------------|-------|------|------|----------|
|           |      |      |             | SLUG  | GPDH  | Ct    | Ct          |                      |       |      |      | AVE.     |
| A01       | SYBR | SLUG | T47D_1_cnt  | 23.06 | 14.69 | 8.37  | (0.11)      | 1.08                 | 1.004 | 0.07 | 0.04 | 8.476    |
| A02       | SYBR | SLUG | T47D_1_cnt  | 23.14 | 14.62 | 8.52  | 0.04        | 0.97                 |       |      |      |          |
| A03       | SYBR | SLUG | T47D_1_cnt  | 23.13 | 14.59 | 8.54  | 0.06        | 0.96                 |       |      |      |          |
| A04       | SYBR | SLUG | T47D_2_cnt+ | 23.16 | 14.42 | 8.74  | 0.26        | 0.83                 | 0.846 | 0.11 | 0.06 |          |
| A05       | SYBR | SLUG | T47D_2_cnt+ | 23.03 | 14.49 | 8.54  | 0.06        | 0.96                 |       |      |      |          |
| A06       | SYBR | SLUG | T47D_2_cnt+ | 23.24 | 14.33 | 8.90  | 0.42        | 0.75                 |       |      |      |          |
| A07       | SYBR | SLUG | T47D_3_Sh#1 | 23.53 | 14.45 | 9.08  | 0.60        | 0.66                 | 0.558 | 0.20 | 0.12 |          |
| A08       | SYBR | SLUG | T47D_3_Sh#1 | 23.61 | 14.59 | 9.01  | 0.53        | 0.69                 |       |      |      |          |
| A09       | SYBR | SLUG | T47D_3_Sh#1 | 23.27 | 13.16 | 10.11 | 1.63        | 0.32                 |       |      |      |          |

|     |      |      |                 |       |       |      |        |      |       |      |      |  |
|-----|------|------|-----------------|-------|-------|------|--------|------|-------|------|------|--|
| A10 | SYBR | SLUG | T47D_4+ rST6    | 23.38 | 14.30 | 9.08 | 0.60   | 0.66 | 0.688 | 0.08 | 0.04 |  |
| A11 | SYBR | SLUG | T47D_4+ rST6    | 23.49 | 14.34 | 9.15 | 0.67   | 0.63 |       |      |      |  |
| A12 | SYBR | SLUG | T47D_4+ rST6    | 23.12 | 14.27 | 8.85 | 0.37   | 0.77 |       |      |      |  |
| B01 | SYBR | SLUG | T47D_5+EXO      | 23.93 | 15.17 | 8.77 | 0.29   | 0.82 | 0.811 | 0.04 | 0.02 |  |
| B02 | SYBR | SLUG | T47D_5+EXO      | 23.83 | 15.10 | 8.73 | 0.25   | 0.84 |       |      |      |  |
| B03 | SYBR | SLUG | T47D_5+EXO      | 23.89 | 15.04 | 8.85 | 0.37   | 0.77 |       |      |      |  |
| B04 | SYBR | SLUG | T47D_6+EXO/rST6 | 24.04 | 15.69 | 8.35 | (0.13) | 1.09 | 0.928 | 0.15 | 0.09 |  |
| B05 | SYBR | SLUG | T47D_6+EXO/rST6 | 24.27 | 15.45 | 8.82 | 0.34   | 0.79 |       |      |      |  |
| B06 | SYBR | SLUG | T47D_6+EXO/rST6 | 24.01 | 15.37 | 8.63 | 0.15   | 0.90 |       |      |      |  |

|            |      |       |                 | Ct    | Ct    | Delta | Delta-Delta |                      |        |      |      | Delta Ct |
|------------|------|-------|-----------------|-------|-------|-------|-------------|----------------------|--------|------|------|----------|
| TWIST gene |      |       |                 | TWIST | GPDH  | Ct    | Ct          | 2 <sup>(-ddct)</sup> | AVE.   | S.D. | S.E. | AVE.     |
| A01        | SYBR | TWIST | T47D_1_cnt      | 33.78 | 14.69 | 19.09 | (0.41)      | 1.33                 | 1.026  | 0.28 | 0.16 | 19.501   |
| A02        | SYBR | TWIST | T47D_1_cnt      | 34.51 | 14.62 | 19.89 | 0.39        | 0.77                 |        |      |      |          |
| A03        | SYBR | TWIST | T47D_1_cnt      | 34.11 | 14.59 | 19.52 | 0.02        | 0.98                 |        |      |      |          |
| A04        | SYBR | TWIST | T47D_2_cnt+     | 31.35 | 14.42 | 16.93 | (2.57)      | 5.93                 | 6.250  | 0.44 | 0.25 |          |
| A05        | SYBR | TWIST | T47D_2_cnt+     | 31.39 | 14.49 | 16.90 | (2.60)      | 6.07                 |        |      |      |          |
| A06        | SYBR | TWIST | T47D_2_cnt+     | 31.08 | 14.33 | 16.75 | (2.76)      | 6.75                 |        |      |      |          |
| A07        | SYBR | TWIST | T47D_3_Sh#1     | 33.17 | 14.45 | 18.72 | (0.78)      | 1.71                 | 1.408  | 0.30 | 0.17 |          |
| A08        | SYBR | TWIST | T47D_3_Sh#1     | 33.93 | 14.59 | 19.34 | (0.16)      | 1.12                 |        |      |      |          |
| A09        | SYBR | TWIST | T47D_3_Sh#1     | 32.18 | 13.16 | 19.03 | (0.47)      | 1.39                 |        |      |      |          |
| A10        | SYBR | TWIST | T47D_4+ rST6    | 30.75 | 14.30 | 16.44 | (3.06)      | 8.33                 | 10.433 | 4.36 | 2.52 |          |
| A11        | SYBR | TWIST | T47D_4+ rST6    | 30.93 | 14.34 | 16.59 | (2.91)      | 7.52                 |        |      |      |          |
| A12        | SYBR | TWIST | T47D_4+ rST6    | 29.82 | 14.27 | 15.55 | (3.95)      | 15.45                |        |      |      |          |
| B01        | SYBR | TWIST | T47D_5+EXO      | 29.99 | 15.17 | 14.83 | (4.68)      | 25.56                | 24.243 | 2.92 | 1.68 |          |
| B02        | SYBR | TWIST | T47D_5+EXO      | 29.89 | 15.10 | 14.79 | (4.72)      | 26.27                |        |      |      |          |
| B03        | SYBR | TWIST | T47D_5+EXO      | 30.16 | 15.04 | 15.12 | (4.39)      | 20.90                |        |      |      |          |
| B04        | SYBR | TWIST | T47D_6+EXO/rST6 | 29.59 | 15.69 | 13.90 | (5.60)      | 48.58                | 43.659 | 4.30 | 2.48 |          |
| B05        | SYBR | TWIST | T47D_6+EXO/rST6 | 29.56 | 15.45 | 14.12 | (5.39)      | 41.81                |        |      |      |          |
| B06        | SYBR | TWIST | T47D_6+EXO/rST6 | 29.53 | 15.37 | 14.16 | (5.34)      | 40.59                |        |      |      |          |

|           |      |      |              | Ct    | Ct    | Delta | Delta-Delta |                      |       |      |      | Delta Ct |
|-----------|------|------|--------------|-------|-------|-------|-------------|----------------------|-------|------|------|----------|
| SOX2 gene |      |      |              | SOX2  | GPDH  | Ct    | Ct          | 2 <sup>(-ddct)</sup> | AVE.  | S.D. | S.E. | AVE.     |
| A01       | SYBR | SOX2 | T47D_1_cnt   | 31.19 | 14.69 | 16.49 | 0.04        | 0.98                 | 1.001 | 0.04 | 0.02 | 16.458   |
| A02       | SYBR | SOX2 | T47D_1_cnt   | 31.02 | 14.62 | 16.39 | (0.07)      | 1.05                 |       |      |      |          |
| A03       | SYBR | SOX2 | T47D_1_cnt   | 31.08 | 14.59 | 16.49 | 0.03        | 0.98                 |       |      |      |          |
| A04       | SYBR | SOX2 | T47D_2_cnt+  | 30.41 | 14.42 | 15.99 | (0.47)      | 1.38                 | 1.188 | 0.24 | 0.14 |          |
| A05       | SYBR | SOX2 | T47D_2_cnt+  | 30.61 | 14.49 | 16.12 | (0.34)      | 1.27                 |       |      |      |          |
| A06       | SYBR | SOX2 | T47D_2_cnt+  | 30.92 | 14.33 | 16.59 | 0.13        | 0.91                 |       |      |      |          |
| A07       | SYBR | SOX2 | T47D_3_Sh#1  | 30.99 | 14.45 | 16.54 | 0.09        | 0.94                 | 0.837 | 0.45 | 0.26 |          |
| A08       | SYBR | SOX2 | T47D_3_Sh#1  | 30.76 | 14.59 | 16.16 | (0.30)      | 1.23                 |       |      |      |          |
| A09       | SYBR | SOX2 | T47D_3_Sh#1  | 31.17 | 13.16 | 18.01 | 1.55        | 0.34                 |       |      |      |          |
| A10       | SYBR | SOX2 | T47D_4+ rST6 | 30.14 | 14.30 | 15.84 | (0.62)      | 1.53                 | 1.213 | 0.38 | 0.22 |          |
| A11       | SYBR | SOX2 | T47D_4+ rST6 | 30.41 | 14.34 | 16.07 | (0.38)      | 1.30                 |       |      |      |          |
| A12       | SYBR | SOX2 | T47D_4+ rST6 | 31.05 | 14.27 | 16.78 | 0.32        | 0.80                 |       |      |      |          |
| B01       | SYBR | SOX2 | T47D_5+EXO   | 29.45 | 15.17 | 14.28 | (2.18)      | 4.53                 | 4.712 | 0.79 | 0.45 |          |
| B02       | SYBR | SOX2 | T47D_5+EXO   | 29.55 | 15.10 | 14.45 | (2.01)      | 4.03                 |       |      |      |          |



|            |      |      |                 |       |       |       |        |      |       |      |      |  |
|------------|------|------|-----------------|-------|-------|-------|--------|------|-------|------|------|--|
| <b>B03</b> | SYBR | SOX2 | T47D_5+EXO      | 29.02 | 15.04 | 13.98 | (2.48) | 5.58 |       |      |      |  |
| <b>B04</b> | SYBR | SOX2 | T47D_6+EXO/rST6 | 29.85 | 15.69 | 14.16 | (2.30) | 4.92 | 4.505 | 0.44 | 0.25 |  |
| <b>B05</b> | SYBR | SOX2 | T47D_6+EXO/rST6 | 29.72 | 15.45 | 14.27 | (2.18) | 4.54 |       |      |      |  |
| <b>B06</b> | SYBR | SOX2 | T47D_6+EXO/rST6 | 29.81 | 15.37 | 14.44 | (2.02) | 4.05 |       |      |      |  |

|            |      |      |                 | Ct     | Ct    | Delta | Delta-Delta |                      |       |      |      | Delta Ct |
|------------|------|------|-----------------|--------|-------|-------|-------------|----------------------|-------|------|------|----------|
| MYC gene   |      |      |                 | MYC    | GPDH  | Ct    | Ct          | 2 <sup>(-ddct)</sup> | AVE.  | S.D. | S.E. | AVE.     |
| <b>A01</b> | SYBR | MYC  | T47D_1_cnt      | 20.09  | 14.69 | 5.40  | 0.32        | 0.80                 | 1.020 | 0.25 | 0.15 | 5.080    |
| <b>A02</b> | SYBR | MYC  | T47D_1_cnt      | 19.76  | 14.62 | 5.14  | 0.06        | 0.96                 |       |      |      |          |
| <b>A03</b> | SYBR | MYC  | T47D_1_cnt      | 19.30  | 14.59 | 4.71  | (0.37)      | 1.30                 |       |      |      |          |
| <b>A04</b> | SYBR | MYC  | T47D_2_cnt+     | 19.44  | 14.42 | 5.02  | (0.06)      | 1.04                 | 1.091 | 0.04 | 0.03 |          |
| <b>A05</b> | SYBR | MYC  | T47D_2_cnt+     | 19.42  | 14.49 | 4.94  | (0.14)      | 1.11                 |       |      |      |          |
| <b>A06</b> | SYBR | MYC  | T47D_2_cnt+     | 19.25  | 14.33 | 4.91  | (0.17)      | 1.12                 |       |      |      |          |
| <b>A07</b> | SYBR | MYC  | T47D_3_Sh#1     | 19.54  | 14.45 | 5.09  | 0.01        | 0.99                 | 0.885 | 0.36 | 0.21 |          |
| <b>A08</b> | SYBR | MYC  | T47D_3_Sh#1     | 19.44  | 14.59 | 4.84  | (0.24)      | 1.18                 |       |      |      |          |
| <b>A09</b> | SYBR | MYC  | T47D_3_Sh#1     | 19.28  | 13.16 | 6.12  | 1.04        | 0.49                 |       |      |      |          |
| <b>A10</b> | SYBR | MYC  | T47D_4+ rST6    | 19.56  | 14.30 | 5.25  | 0.17        | 0.89                 | 0.796 | 0.08 | 0.05 |          |
| <b>A11</b> | SYBR | MYC  | T47D_4+ rST6    | 19.78  | 14.34 | 5.44  | 0.36        | 0.78                 |       |      |      |          |
| <b>A12</b> | SYBR | MYC  | T47D_4+ rST6    | 19.82  | 14.27 | 5.55  | 0.47        | 0.72                 |       |      |      |          |
| <b>B01</b> | SYBR | MYC  | T47D_5+EXO      | 19.35  | 15.17 | 4.18  | (0.90)      | 1.86                 | 1.824 | 0.25 | 0.14 |          |
| <b>B02</b> | SYBR | MYC  | T47D_5+EXO      | 19.14  | 15.10 | 4.04  | (1.04)      | 2.05                 |       |      |      |          |
| <b>B03</b> | SYBR | MYC  | T47D_5+EXO      | 19.48  | 15.04 | 4.44  | (0.64)      | 1.56                 |       |      |      |          |
| <b>B04</b> | SYBR | MYC  | T47D_6+EXO/rST6 | 19.33  | 15.69 | 3.64  | (1.44)      | 2.71                 | 2.386 | 0.28 | 0.16 |          |
| <b>B05</b> | SYBR | MYC  | T47D_6+EXO/rST6 | 19.36  | 15.45 | 3.91  | (1.17)      | 2.24                 |       |      |      |          |
| <b>B06</b> | SYBR | MYC  | T47D_6+EXO/rST6 | 19.31  | 15.37 | 3.94  | (1.14)      | 2.21                 |       |      |      |          |
|            |      |      |                 | Ct     | Ct    | Delta | Delta-Delta |                      |       |      |      | Delta Ct |
| Oct4 gene  |      |      |                 | (Oct4) | GPDH  | Ct    | Ct          | 2 <sup>(-ddct)</sup> | AVE.  | S.D. | S.E. | AVE.     |
| <b>A01</b> | SYBR | OCT4 | T47D_1_cnt      | 23.16  | 14.69 | 8.47  | (0.08)      | 1.06                 | 1.001 | 0.05 | 0.03 | 8.545    |
| <b>A02</b> | SYBR | OCT4 | T47D_1_cnt      | 23.19  | 14.62 | 8.57  | 0.02        | 0.99                 |       |      |      |          |
| <b>A03</b> | SYBR | OCT4 | T47D_1_cnt      | 23.19  | 14.59 | 8.60  | 0.06        | 0.96                 |       |      |      |          |
| <b>A04</b> | SYBR | OCT4 | T47D_2_cnt+     | 23.11  | 14.42 | 8.69  | 0.15        | 0.90                 | 0.893 | 0.06 | 0.04 |          |
| <b>A05</b> | SYBR | OCT4 | T47D_2_cnt+     | 23.11  | 14.49 | 8.62  | 0.08        | 0.95                 |       |      |      |          |
| <b>A06</b> | SYBR | OCT4 | T47D_2_cnt+     | 23.15  | 14.33 | 8.82  | 0.27        | 0.83                 |       |      |      |          |
| <b>A07</b> | SYBR | OCT4 | T47D_3_Sh#1     | 23.58  | 14.45 | 9.13  | 0.59        | 0.67                 | 0.658 | 0.28 | 0.16 |          |
| <b>A08</b> | SYBR | OCT4 | T47D_3_Sh#1     | 23.24  | 14.59 | 8.65  | 0.10        | 0.93                 |       |      |      |          |
| <b>A09</b> | SYBR | OCT4 | T47D_3_Sh#1     | 23.11  | 13.16 | 9.96  | 1.41        | 0.38                 |       |      |      |          |
| <b>A10</b> | SYBR | OCT4 | T47D_4+ rST6    | 23.11  | 14.30 | 8.80  | 0.26        | 0.84                 | 0.853 | 0.07 | 0.04 |          |
| <b>A11</b> | SYBR | OCT4 | T47D_4+ rST6    | 23.22  | 14.34 | 8.88  | 0.34        | 0.79                 |       |      |      |          |
| <b>A12</b> | SYBR | OCT4 | T47D_4+ rST6    | 22.92  | 14.27 | 8.65  | 0.10        | 0.93                 |       |      |      |          |
| <b>B01</b> | SYBR | OCT4 | T47D_5+EXO      | 23.39  | 15.17 | 8.22  | (0.32)      | 1.25                 | 1.066 | 0.17 | 0.10 |          |
| <b>B02</b> | SYBR | OCT4 | T47D_5+EXO      | 23.59  | 15.10 | 8.49  | (0.05)      | 1.04                 |       |      |      |          |
| <b>B03</b> | SYBR | OCT4 | T47D_5+EXO      | 23.72  | 15.04 | 8.68  | 0.14        | 0.91                 |       |      |      |          |
| <b>B04</b> | SYBR | OCT4 | T47D_6+EXO/rST6 | 23.68  | 15.69 | 7.99  | (0.55)      | 1.47                 | 1.238 | 0.20 | 0.11 |          |
| <b>B05</b> | SYBR | OCT4 | T47D_6+EXO/rST6 | 23.83  | 15.45 | 8.38  | (0.16)      | 1.12                 |       |      |      |          |
| <b>B06</b> | SYBR | OCT4 | T47D_6+EXO/rST6 | 23.74  | 15.37 | 8.37  | (0.18)      | 1.13                 |       |      |      |          |

|  |  |  |  | Ct | Ct | Delta | Delta-Delta |  |  |  |  | Delta Ct |
|--|--|--|--|----|----|-------|-------------|--|--|--|--|----------|
|--|--|--|--|----|----|-------|-------------|--|--|--|--|----------|

| Nanog gene |      |       |                 | Nanog | GPDH  | Ct    | Ct     | 2 <sup>-Δ(-ddct)</sup> | AVE.  | S.D. | S.E. | AVE.   |
|------------|------|-------|-----------------|-------|-------|-------|--------|------------------------|-------|------|------|--------|
| A01        | SYBR | Nanog | T47D_1_cnt      | 27.39 | 14.69 | 12.70 | 0.21   | 0.86                   | 1.005 | 0.12 | 0.07 | 12.484 |
| A02        | SYBR | Nanog | T47D_1_cnt      | 26.99 | 14.62 | 12.36 | (0.12) | 1.09                   |       |      |      |        |
| A03        | SYBR | Nanog | T47D_1_cnt      | 26.98 | 14.59 | 12.39 | (0.09) | 1.07                   |       |      |      |        |
| A04        | SYBR | Nanog | T47D_2_cnt+     | 26.25 | 14.42 | 11.83 | (0.66) | 1.58                   | 1.292 | 0.27 | 0.15 |        |
| A05        | SYBR | Nanog | T47D_2_cnt+     | 26.65 | 14.49 | 12.16 | (0.32) | 1.25                   |       |      |      |        |
| A06        | SYBR | Nanog | T47D_2_cnt+     | 26.75 | 14.33 | 12.42 | (0.07) | 1.05                   |       |      |      |        |
| A07        | SYBR | Nanog | T47D_3_Sh#1     | 28.94 | 14.45 | 14.49 | 2.01   | 0.25                   | 0.224 | 0.11 | 0.06 |        |
| A08        | SYBR | Nanog | T47D_3_Sh#1     | 28.73 | 14.59 | 14.13 | 1.65   | 0.32                   |       |      |      |        |
| A09        | SYBR | Nanog | T47D_3_Sh#1     | 28.91 | 13.16 | 15.75 | 3.27   | 0.10                   |       |      |      |        |
| A10        | SYBR | Nanog | T47D_4+ rST6    | 26.55 | 14.30 | 12.25 | (0.24) | 1.18                   | 1.173 | 0.05 | 0.03 |        |
| A11        | SYBR | Nanog | T47D_4+ rST6    | 26.67 | 14.34 | 12.33 | (0.16) | 1.11                   |       |      |      |        |
| A12        | SYBR | Nanog | T47D_4+ rST6    | 26.46 | 14.27 | 12.19 | (0.29) | 1.22                   |       |      |      |        |
| B01        | SYBR | Nanog | T47D_5+EXO      | 28.41 | 15.17 | 13.24 | 0.76   | 0.59                   | 0.567 | 0.02 | 0.01 |        |
| B02        | SYBR | Nanog | T47D_5+EXO      | 28.46 | 15.10 | 13.36 | 0.87   | 0.55                   |       |      |      |        |
| B03        | SYBR | Nanog | T47D_5+EXO      | 28.35 | 15.04 | 13.31 | 0.83   | 0.56                   |       |      |      |        |
| B04        | SYBR | Nanog | T47D_6+EXO/rST6 | 26.02 | 15.69 | 10.33 | (2.15) | 4.45                   | 4.186 | 0.34 | 0.20 |        |
| B05        | SYBR | Nanog | T47D_6+EXO/rST6 | 26.00 | 15.45 | 10.56 | (1.93) | 3.80                   |       |      |      |        |
| B06        | SYBR | Nanog | T47D_6+EXO/rST6 | 25.75 | 15.37 | 10.38 | (2.11) | 4.31                   |       |      |      |        |

| CD44 gene |      |      |                 | Ct    | Ct    | Delta | Delta-Delta | 2 <sup>-Δ(-ddct)</sup> | AVE.  | S.D. | S.E. | Delta Ct |
|-----------|------|------|-----------------|-------|-------|-------|-------------|------------------------|-------|------|------|----------|
|           |      |      |                 | CD44  | GPDH  | Ct    | Ct          |                        |       |      |      |          |
| E01       | SYBR | CD44 | T47D_1_cnt      | 17.13 | 14.69 | 2.44  | 0.227       | 0.855                  | 1.025 | 0.29 | 0.17 | 2.21     |
| E02       | SYBR | CD44 | T47D_1_cnt      | 17.06 | 14.62 | 2.43  | 0.222       | 0.857                  |       |      |      |          |
| E03       | SYBR | CD44 | T47D_1_cnt      | 16.35 | 14.59 | 1.76  | (0.446)     | 1.362                  |       |      |      |          |
| E04       | SYBR | CD44 | T47D_2_cnt+     | 16.92 | 14.42 | 2.50  | 0.285       | 0.821                  | 0.848 | 0.15 | 0.09 |          |
| E05       | SYBR | CD44 | T47D_2_cnt+     | 16.68 | 14.49 | 2.19  | (0.017)     | 1.012                  |       |      |      |          |
| E06       | SYBR | CD44 | T47D_2_cnt+     | 17.04 | 14.33 | 2.70  | 0.492       | 0.711                  |       |      |      |          |
| E07       | SYBR | CD44 | T47D_3_Sh#1     | 16.36 | 14.45 | 1.91  | (0.298)     | 1.230                  | 0.961 | 0.42 | 0.24 |          |
| E08       | SYBR | CD44 | T47D_3_Sh#1     | 16.57 | 14.59 | 1.98  | (0.235)     | 1.177                  |       |      |      |          |
| E09       | SYBR | CD44 | T47D_3_Sh#1     | 16.44 | 13.16 | 3.28  | 1.072       | 0.476                  |       |      |      |          |
| E10       | SYBR | CD44 | T47D_4+ rST6    | 16.65 | 14.30 | 2.35  | 0.142       | 0.906                  | 1.042 | 0.17 | 0.10 |          |
| E11       | SYBR | CD44 | T47D_4+ rST6    | 16.56 | 14.34 | 2.22  | 0.012       | 0.992                  |       |      |      |          |
| E12       | SYBR | CD44 | T47D_4+ rST6    | 16.18 | 14.27 | 1.92  | (0.295)     | 1.227                  |       |      |      |          |
| F01       | SYBR | CD44 | T47D_5+EXO      | 16.64 | 15.17 | 1.47  | (0.736)     | 1.665                  | 1.414 | 0.28 | 0.16 |          |
| F02       | SYBR | CD44 | T47D_5+EXO      | 17.16 | 15.10 | 2.06  | (0.155)     | 1.113                  |       |      |      |          |
| F03       | SYBR | CD44 | T47D_5+EXO      | 16.70 | 15.04 | 1.66  | (0.548)     | 1.462                  |       |      |      |          |
| F04       | SYBR | CD44 | T47D_6+EXO/rST6 | 16.00 | 15.69 | 0.31  | (1.896)     | 3.721                  | 3.265 | 0.40 | 0.23 |          |
| F05       | SYBR | CD44 | T47D_6+EXO/rST6 | 16.02 | 15.45 | 0.57  | (1.637)     | 3.109                  |       |      |      |          |
| F06       | SYBR | CD44 | T47D_6+EXO/rST6 | 16.02 | 15.37 | 0.64  | (1.568)     | 2.964                  |       |      |      |          |

| AldH1 gene |      |       |             | Ct    | Ct    | Delta | Delta-Delta | 2 <sup>-Δ(-ddct)</sup> | AVE.  | S.D. | S.E. | Delta Ct |
|------------|------|-------|-------------|-------|-------|-------|-------------|------------------------|-------|------|------|----------|
|            |      |       |             | AldH1 | GPDH  | Ct    | Ct          |                        |       |      |      |          |
| A01        | SYBR | AldH1 | T47D_1_cnt  | 30.48 | 14.69 | 15.79 | (0.22)      | 1.17                   | 1.017 | 0.23 | 0.13 | 16.014   |
| A02        | SYBR | AldH1 | T47D_1_cnt  | 31.05 | 14.62 | 16.43 | 0.42        | 0.75                   |       |      |      |          |
| A03        | SYBR | AldH1 | T47D_1_cnt  | 30.42 | 14.59 | 15.83 | (0.18)      | 1.14                   |       |      |      |          |
| A04        | SYBR | AldH1 | T47D_2_cnt+ | 29.99 | 14.42 | 15.57 | (0.44)      | 1.35                   | 1.421 | 0.10 | 0.06 |          |

|            |      |       |                     |       |       |       |        |      |       |      |      |  |
|------------|------|-------|---------------------|-------|-------|-------|--------|------|-------|------|------|--|
| <b>A05</b> | SYBR | AldH1 | T47D_2_cnt+         | 30.03 | 14.49 | 15.55 | (0.46) | 1.38 |       |      |      |  |
| <b>A06</b> | SYBR | AldH1 | T47D_2_cnt+         | 29.73 | 14.33 | 15.40 | (0.61) | 1.53 |       |      |      |  |
| <b>A07</b> | SYBR | AldH1 | T47D_3_Sh#1         | 31.05 | 14.45 | 16.60 | 0.59   | 0.66 | 0.578 | 0.28 | 0.16 |  |
| <b>A08</b> | SYBR | AldH1 | T47D_3_Sh#1         | 30.93 | 14.59 | 16.33 | 0.32   | 0.80 |       |      |      |  |
| <b>A09</b> | SYBR | AldH1 | T47D_3_Sh#1         | 31.06 | 13.16 | 17.90 | 1.89   | 0.27 |       |      |      |  |
| <b>A10</b> | SYBR | AldH1 | T47D_4+ rST6        | 30.99 | 14.30 | 16.69 | 0.68   | 0.63 | 0.779 | 0.28 | 0.16 |  |
| <b>A11</b> | SYBR | AldH1 | T47D_4+ rST6        | 30.21 | 14.34 | 15.87 | (0.14) | 1.10 |       |      |      |  |
| <b>A12</b> | SYBR | AldH1 | T47D_4+ rST6        | 31.00 | 14.27 | 16.73 | 0.72   | 0.61 |       |      |      |  |
| <b>B01</b> | SYBR | AldH1 | T47D_5+EXO          | 30.40 | 15.17 | 15.23 | (0.78) | 1.72 | 1.784 | 0.21 | 0.12 |  |
| <b>B02</b> | SYBR | AldH1 | T47D_5+EXO          | 30.41 | 15.10 | 15.31 | (0.70) | 1.62 |       |      |      |  |
| <b>B03</b> | SYBR | AldH1 | T47D_5+EXO          | 30.04 | 15.04 | 15.00 | (1.01) | 2.01 |       |      |      |  |
| <b>B04</b> | SYBR | AldH1 | T47D_6+EXO/rST<br>6 | 30.41 | 15.69 | 14.72 | (1.29) | 2.45 | 2.268 | 0.22 | 0.13 |  |
| <b>B05</b> | SYBR | AldH1 | T47D_6+EXO/rST<br>6 | 30.23 | 15.45 | 14.78 | (1.23) | 2.34 |       |      |      |  |
| <b>B06</b> | SYBR | AldH1 | T47D_6+EXO/rST<br>6 | 30.37 | 15.37 | 15.00 | (1.01) | 2.02 |       |      |      |  |
